# Supplementary material for: The Potential Role of Exosomes in Aesthetic Plastic Surgery: A Review of Current Literature
Source: PubMed Central journal article supplement — Plast Reconstr Surg Glob Open. 2023 Jun 12;11(6):e5051. doi: 10.1097/GOX.0000000000005051 (PMC10259637; doi:10.1097/gox.0000000000005051), 2023-06-12
Supplement: gox-11-e5051-s002.pdf [file gox-11-e5051-s002.pdf]

| Authors/Year of Publication     | Level of Evidence (I-VI) * | Subject<br>n =                               | Type of Study  | Proposed Mechanism of Action                                                                                                                                                               | Outcome                                                                                                                         |
|---------------------------------|----------------------------|----------------------------------------------|----------------|--------------------------------------------------------------------------------------------------------------------------------------------------------------------------------------------|---------------------------------------------------------------------------------------------------------------------------------|
| Wang et al. <sup>4</sup> (2019) | N/A **                     | HUVECs (n= N/A)                              | In-vitro study | Promoted wound healing via stimulation of angiogenesis process; FEP gel had components promoting sustained release of ASC-exos, therefore further enhanced exosomes' wound healing effects | Combination use of FEP gel and exosomes had synergistic effect in wound healing; skin appendages formation and less scar tissue |
|                                 |                            | Mouse (n= 48)                                | Animal study   |                                                                                                                                                                                            |                                                                                                                                 |
| Wu et al. <sup>7</sup> (2021)   | N/A **                     | Human keloid fibroblasts (n= N/A)            | In-vitro study | ASC-exos suppressed keloid fibroblast's actions by inhibiting expression of TGF- $\beta$ 1/SMAD pathway                                                                                    | Reduced keloid formation                                                                                                        |
| Yuan et al. <sup>8</sup> (2021) | N/A **                     | Human hypertrophic scar fibroblasts (n= N/A) | In-vitro study | ASC-exos inhibited fibrosis and scar hyperplasia through its miR-29a-regulated TGF- $\beta$ 2/SMAD 3 pathway                                                                               | Reduced pathological scar formation                                                                                             |
|                                 |                            | Mouse (n= 36)                                | Animal study   |                                                                                                                                                                                            |                                                                                                                                 |

|                                  |          |                                   |                                                      |                                                                                                                                                                                                                                                                                                                                               |                                                                                                                                                                                |
|----------------------------------|----------|-----------------------------------|------------------------------------------------------|-----------------------------------------------------------------------------------------------------------------------------------------------------------------------------------------------------------------------------------------------------------------------------------------------------------------------------------------------|--------------------------------------------------------------------------------------------------------------------------------------------------------------------------------|
| Duan et al. <sup>9</sup> (2020)  | N/A **   | Human dermal fibroblasts (n= N/A) | In-vitro study                                       | EPSC-exos suppressed myofibroblast differentiation via miR-425-5p- and miR-142-3p-mediated inhibition of TGF- $\beta$ 1 expression                                                                                                                                                                                                            | Improved wound healing rate, reduced scar formation during wound healing                                                                                                       |
|                                  |          | Rat (n= 30)                       | Animal study                                         |                                                                                                                                                                                                                                                                                                                                               |                                                                                                                                                                                |
| Kwon et al. <sup>10</sup> (2020) | Level II | Human (n = 25)                    | Split-face, double-blinded, randomized control trial | ASC-exos induce rapid healing by supplying several anti-inflammatory and regenerative growth factors, as well as optimizing the migration, proliferation, and collagen synthesis of fibroblasts. ADSC-exos also decreased scarring during wound repair via regulating type III: type I collagen, TGF $\beta$ 3: TGF $\beta$ 1, and MMP3:TIMP1 | Combined use of ASC-exos with resurfacing device provided synergistic effects on the treatment of atrophic acne scar and provided shorter recovery time and fewer side effects |
| Wang et al. <sup>11</sup> (2017) | N/A **   | Human dermal fibroblasts (n= N/A) | In-vitro study                                       | ASC-exos reduced scar formation by increasing collagen III:                                                                                                                                                                                                                                                                                   | Less scar formation                                                                                                                                                            |

|                                   |        |                                                            |                |                                                                                                                                                                                                                              |                                               |
|-----------------------------------|--------|------------------------------------------------------------|----------------|------------------------------------------------------------------------------------------------------------------------------------------------------------------------------------------------------------------------------|-----------------------------------------------|
|                                   |        | Mouse (n= N/A)                                             | Animal study   | collagen I and prevented differentiation of myofibroblast by increasing TGF- $\beta$ 3: TGF- $\beta$ 1. ASC-exos promoted ECM remodeling by increasing MMP3:TIMP1 in skin dermal fibroblasts via activating ERK/MAPK pathway |                                               |
| Fang et al. <sup>12</sup> (2016)  | N/A ** | Myofibroblasts (n= N/A)                                    | In-vitro study | miR-21, -23a, -125b, and -145 suppressed myofibroblast formation by inhibition of TGF-                                                                                                                                       | Prevented scar formation during wound healing |
|                                   |        | Mouse (n= N/A)                                             | Animal study   | $\beta$ 2/SMAD2 signaling pathway. Collagen I deposition was reduced via inhibiting $\alpha$ -SMA gene expression (UC-exos)                                                                                                  |                                               |
| Zhang et al. <sup>26</sup> (2021) | N/A ** | Human dermal fibroblasts and epidermal stem cells (n= N/A) | In-vitro study | UC-exos suppressed scar formation by inhibiting myofibroblast differentiation via miR-21-5p- and miR-125b-5p-                                                                                                                | Prevented scar formation during wound healing |

|                                  |        |                                                         |                |                                                                                                                               |                                                                                                                                                                                        |
|----------------------------------|--------|---------------------------------------------------------|----------------|-------------------------------------------------------------------------------------------------------------------------------|----------------------------------------------------------------------------------------------------------------------------------------------------------------------------------------|
|                                  |        | Rat (n = 30)                                            | Animal study   | mediated TGF- $\beta$ receptor inhibition                                                                                     |                                                                                                                                                                                        |
| Hu et al. <sup>27</sup> (2018)   | N/A ** | Human dermal fibroblasts and endothelial cells (n= N/A) | In-vitro study | UC-exos enhanced wound healing by regulating fibroblasts and angiogenesis via miR-21-3p's effect on PTEN and SPRY1 inhibition | Reduced scar width                                                                                                                                                                     |
|                                  |        | Mouse (n= 20)                                           | Animal study   |                                                                                                                               |                                                                                                                                                                                        |
| Zhou et al. <sup>29</sup> (2021) | N/A ** | Mouse (n= N/A)                                          | Animal study   | ASC-exos increased the ratios of collagen III to collagen I in the late stage to suppress scar tissue formation               | Local smear improved healing time and reduce scar formation; effective combination of IV and topical administration in promoting healing in extensive injuries such as burn and scalds |
| Hu et al. <sup>30</sup> (2016)   | N/A ** | Human dermal fibroblasts (n= N/A)                       | In-vitro study | ASC-exos promoted wound healing in early stages by                                                                            | Decreased healing time and reduced scar                                                                                                                                                |

|                                   |        |                                                      |                |                                                                                                                                                  |                                                                                                             |
|-----------------------------------|--------|------------------------------------------------------|----------------|--------------------------------------------------------------------------------------------------------------------------------------------------|-------------------------------------------------------------------------------------------------------------|
|                                   |        | Mouse (n= N/A)                                       | Animal study   | increasing type I and type III collagen distribution. Whereas in the late stages, ASC-exos inhibited collagen synthesis to reduce scar formation | formation                                                                                                   |
| Zhang et al. <sup>31</sup> (2015) | N/A ** | Human dermal fibroblasts and HUVECs (n= N/A)         | In-vitro study | Wound healing process was accelerated via hiPSC-MSC-exos stimulation on collagen maturity and neovascularization at wound sites                  | Promoted granulation tissue formation and angiogenesis, leading to increased healing and reduced scar width |
|                                   |        | Rat (n= N/A)                                         | Animal study   |                                                                                                                                                  |                                                                                                             |
| Li et al. <sup>34</sup> (2021)    | N/A ** | Human hypertrophic scar derived fibroblasts (n= N/A) | In-vitro study | ASC-exos suppressed hypertrophic scar fibrosis via its miR-192-5p-targeted IL-17RA to regulate SMAD pathway                                      | Reduced hypertrophic scar formation                                                                         |
|                                   |        | Mouse (n= 12)                                        | Animal study   |                                                                                                                                                  |                                                                                                             |
| Wang et al. <sup>35</sup> (2019)  | N/A ** | HUVECs (n= N/A)                                      | In-vitro study | FHE gel had components promoting sustained release of ASC-exos, therefore further enhanced exosomes' wound                                       | Combination of FHE hydrogel and exosomes had synergistic effect in wound healing and skin                   |
|                                   |        | Mouse (n= 48)                                        | Animal study   |                                                                                                                                                  |                                                                                                             |

|                                                                                                                                                                                                                                                                                                                                                                                                                                                                                                                                                                                                                                                                                                                                                                                                |  |  |  |                 |                                                              |
|------------------------------------------------------------------------------------------------------------------------------------------------------------------------------------------------------------------------------------------------------------------------------------------------------------------------------------------------------------------------------------------------------------------------------------------------------------------------------------------------------------------------------------------------------------------------------------------------------------------------------------------------------------------------------------------------------------------------------------------------------------------------------------------------|--|--|--|-----------------|--------------------------------------------------------------|
|                                                                                                                                                                                                                                                                                                                                                                                                                                                                                                                                                                                                                                                                                                                                                                                                |  |  |  | healing effects | regeneration; skin appendages formation and less scar tissue |
| <p>*Per American Society of Plastic Surgeons Rating Levels of Evidence and Grading Recommendations: Evidence Rating Scale for Therapeutic Studies.<sup>5</sup> **Animal/laboratory studies are considered not ratable in American Society of Plastic Surgeons Rating Levels of Evidence and Grading Recommendations pyramid scheme.</p>                                                                                                                                                                                                                                                                                                                                                                                                                                                        |  |  |  |                 |                                                              |
| <p>Abbreviations: adipose-derived stem cell exosomes (ASC-exos), umbilical cord-derived stem cell exosomes (UC-exos), epidermal stem cell-derived exosomes (EPSC-exos), human induced pluripotent stem cell-derived mesenchymal stem cells-derived exosomes (hiPSC-MSC-exos), tissue growth factor beta (TGF-<math>\beta</math>), interleukin 17 receptor A (IL-17RA), fractional carbon dioxide laser (FCL), matrix metalloproteinase 3 (MMP3), tissue inhibitors of MMPs 1 (TIMP1), Pluronic F127 + oxidative hyaluronic acid + Poly-<math>\epsilon</math>-L-lysine (FHE), Pluronic F127 + PEI + APu (FEP), Sprouty RTK signaling antagonist 1 (SPRY1), extracellular matrix (ECM), alpha-smooth muscle actin (<math>\alpha</math>-SMA), human umbilical vein endothelial cells (HUVECs)</p> |  |  |  |                 |                                                              |

**Table, Supplementary Digital Content 2.** A table that summarizes the mechanism of exosomes in scar revision.
