# Supplementary material for: The Potential Role of Exosomes in Aesthetic Plastic Surgery: A Review of Current Literature
Source: PubMed Central journal article supplement — Plast Reconstr Surg Glob Open. 2023 Jun 12;11(6):e5051. doi: 10.1097/GOX.0000000000005051 (PMC10259637; doi:10.1097/gox.0000000000005051), 2023-06-12
Supplement: gox-11-e5051-s003.pdf [file gox-11-e5051-s003.pdf]

| Authors/Year of Publication       | Level of Evidence (I-VI) * | Subject<br>n=                 | Type of Study  | Proposed Mechanism of Action                                                                                                                      | Outcome                                                        |
|-----------------------------------|----------------------------|-------------------------------|----------------|---------------------------------------------------------------------------------------------------------------------------------------------------|----------------------------------------------------------------|
| Hu et al. <sup>13</sup> (2020)    | N/A**                      | Mouse (n= 4)                  | Animal study   | DP spheroid-exos promoted development of HFs via miR-218-5p-mediated $\beta$ -catenin regulation (downregulated SFRP2, a WNT signaling inhibitor) | Promoted hair regeneration                                     |
| Zhou et al. <sup>14</sup> (2018)  | N/A**                      | Human ORSCs (n= N/A)          | In-vitro study | DPC-exos upregulated $\beta$ -catenin and Shh levels                                                                                              | Promoted hair follicle growth and development                  |
|                                   |                            | Mouse (n= 12)                 | Animal study   |                                                                                                                                                   |                                                                |
| Kwack et al. <sup>40</sup> (2019) | N/A**                      | Human hair follicles (n= N/A) | In-vitro study | DPC-exos promoted hair growth and regeneration by regulating the activity of follicular dermal and epidermal cells                                | Promoted hair growth and regeneration, prevention of hair loss |
|                                   |                            | Mouse (n= N/A)                | Animal study   |                                                                                                                                                   |                                                                |

|                                   |                |                              |                |                                                                                                                                                                         |                                             |
|-----------------------------------|----------------|------------------------------|----------------|-------------------------------------------------------------------------------------------------------------------------------------------------------------------------|---------------------------------------------|
| Yan et al. <sup>44</sup> (2019)   | N/A**          | Cashmere goat HFSCs (n= N/A) | In-vitro study | Overexpression of miR-22-5p in DPC-exos inhibited HFSCs proliferation by targeting LEF1 gene                                                                            | Regulated hair growth                       |
| Ogawa et al. <sup>45</sup> (2021) | N/A**          | Mouse (n= 18)                | Animal study   | Fistein-treated-HaCaT cell-derived exos promoted HFSCs activity via activating $\beta$ -catenin                                                                         | Promoted hair growth                        |
| Yang et al. <sup>46</sup> (2019)  | N/A**          | Mouse (n= N/A)               | Animal study   | MSC-exos delivered through microneedle-based approach provided a sustained delivery of HFSCs activators, therefore enhancing the exosomes' effects in hair regeneration | Promoted hair regeneration and pigmentation |
| Huh and Kwon <sup>47</sup> (2019) | N/A (abstract) | -                            | In-vitro study | MSC-exos stimulated proliferation of HFs, accelerated telogen-anagen progression, and protected HFs from ROS and androgen                                               | Increased hair thickness and density        |
|                                   |                | Human (n= 20)                | Pilot study    |                                                                                                                                                                         |                                             |

\*Per American Society of Plastic Surgeons Rating Levels of Evidence and Grading Recommendations: Evidence Rating Scale for Therapeutic Studies.<sup>5</sup> \*\*Animal/laboratory studies are considered not ratable in American Society of Plastic Surgeons Rating Levels of Evidence and Grading

Recommendations pyramid scheme.

Abbreviations: human keratinocyte (HaCaT), hair follicle stem cells (HFSCs), dermal papilla-derived exosomes (DPC-exos), dermal papilla spheroid-derived exosomes (DP spheroid-exos), mesenchymal stem cell-derived exosomes (MSC-exos), dermal papilla (DP), dermal papilla cells (DPCs), hair follicles (HFs), keratinocyte growth factor (KGF), hepatocyte growth factor (HGF), insulin-like growth factor 1 (IGF-1), secreted frizzled-related protein 2 (SFRP2), Wingless-related integration site (WNT), outer root sheath cells (ORSCs), lymphoid enhancer binding factor 1 (LEF1), reactive oxygen species (ROS), sonic hedgehog (Shh)

**Table, Supplementary Digital Content 3.** A table that summarizes the mechanism of exosomes in hair restoration.
